# Supplementary material
Source: PubMed Central journal article supplement (PMC4078860)
Supplement: 1404953111_pnas.201404953SI.pdf [file 1404953111_pnas.201404953SI.pdf]

# Supporting Information

## Alnabulsi and Drury 10.1073/pnas.1404953111

### Supporting Methods

**Safety.** There were two questionnaire items about safety: “I feel safe on the Hajj” and “I feel safe in the crowd” ( $r = 0.49, P < 0.001$ ).

**Management Competence.** There were nine items in the questionnaire measuring the pilgrims’ perceptions of competence in the Saudi staff managing aspects of the Hajj: “The Saudi staff have organized the events well”; “There are enough Saudi staff to manage the crowd safely at the entrance to Haram”; “There are enough Saudi staff to manage the crowd safely at the exits of Haram”; “There are enough Saudi staff to manage the crowd safely at the plazas of the Haram”; “There are enough Saudi staff to manage the crowd safely at Tawaf”; “There are enough Saudi staff to manage the crowd safely at Sa’ee” (Sa’ee is a ritual that takes place in the Holy Mosque that comprises brisk walking up and down, representing Hajar’s search for water for her son Ismail.); “There are enough Saudi staff to manage the crowd safely in the Hajj in general”; “I trust the Saudi staff to respond effectively if there is an emergency”; and “The Saudi staff are competent” ( $\alpha = 0.92$ ).

**Identification as a Muslim.** There were three items measuring the strength of participants’ self-definition as Muslim: “Being a Muslim is a reflection of who I am”; “I think of myself in terms of my Muslim identity”; and “Being a Muslim is important to me” ( $\alpha = 0.71$ ). These items were partly based on measures developed by Doosje et al. (1).

**Others’ Identification as Muslim.** There were three items measuring the extent to which participants saw others in the crowd as Muslims: “I think of the other people here as Muslim brothers”; “The Muslim identity is important to the other people in the crowd”; and “In my view, other people in this crowd are good Muslims” ( $\alpha = 0.79$ ).

**Identification with the Crowd.** There were five items measuring the strength of participants’ identification or sense of unity with the crowd itself: “I feel that I am part of this crowd”; “I feel at one with the people around me”; “I feel a sense of togetherness with other people on the Hajj”; “I feel unity with others”; and “I feel strong ties with other people on the Hajj” ( $\alpha = 0.88$ ).

**Perceived Support.** Participants’ perceptions of social support from others on the Hajj, including expectations of such support, were measured by three items: “In my view, most pilgrims are supportive of others”; “In my view, most pilgrims are respectful of others”; and “If I need help, other pilgrims would help me” ( $\alpha = 0.82$ ).

All items were measured on seven-point Likert scales anchored by 1 (“disagree strongly”) and 7 (“agree strongly”).

**Ethics Statement.** The study protocol was approved by the Ethical Committee, Custodian of the Two Holy Mosques Institute of Hajj Research, Umm Al-Qura University (Mecca) Saudi Arabia, and by the University of Sussex, Brighton, United Kingdom in July 2012. All participants provided their written informed consent before participation.

1. Doosje B, Branscombe NR, Spears R, Manstead ASR (1998) Guilty by association: When one’s group has a negative history. *J Pers Soc Psychol* 75(4):872–886.
